# Supplementary material for: The MinCDE Cell Division System Participates in the Regulation of Type III Secretion System (T3SS) Genes, Bacterial Virulence, and Motility in Xanthomonas oryzae pv. oryzae
Source: MDPI journal article supplement (doi:10.3390/microorganisms10081549), 2022-07-31
Supplement: s1 [file s1]

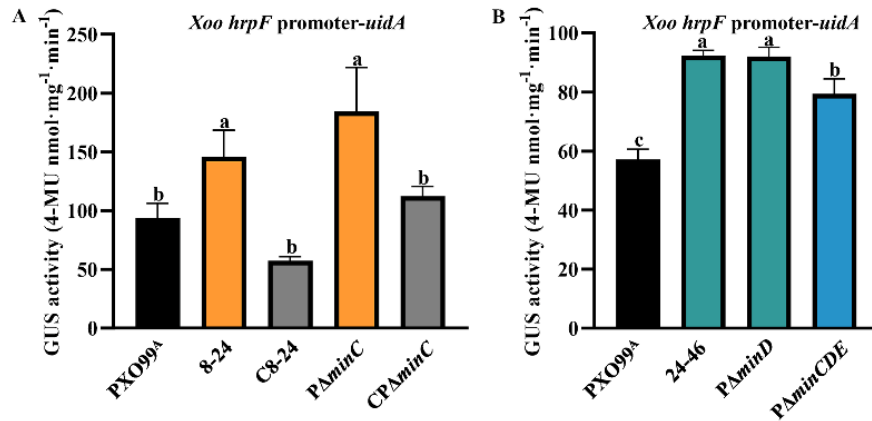

**Figure S1. The *Xoo* Min system contributes to *hrpF* gene expression.** (A) The *hrpF* promoter-driven GUS activity of PXO99A, 8-24, PΔminC, and the complementary strains C8-24 and CPΔminC measured in XOM3 at 3 h post-induction. (B) The *hrpF* promoter-driven GUS activity of PXO99A, 24-46, PΔminD, and t PΔminCDE measured in XOM3 at 3 h post-induction. Error bars indicate standard deviation. Differences between strains were compared using the LSD test, different letters indicate significant differences ( $p < 0.05$ ).

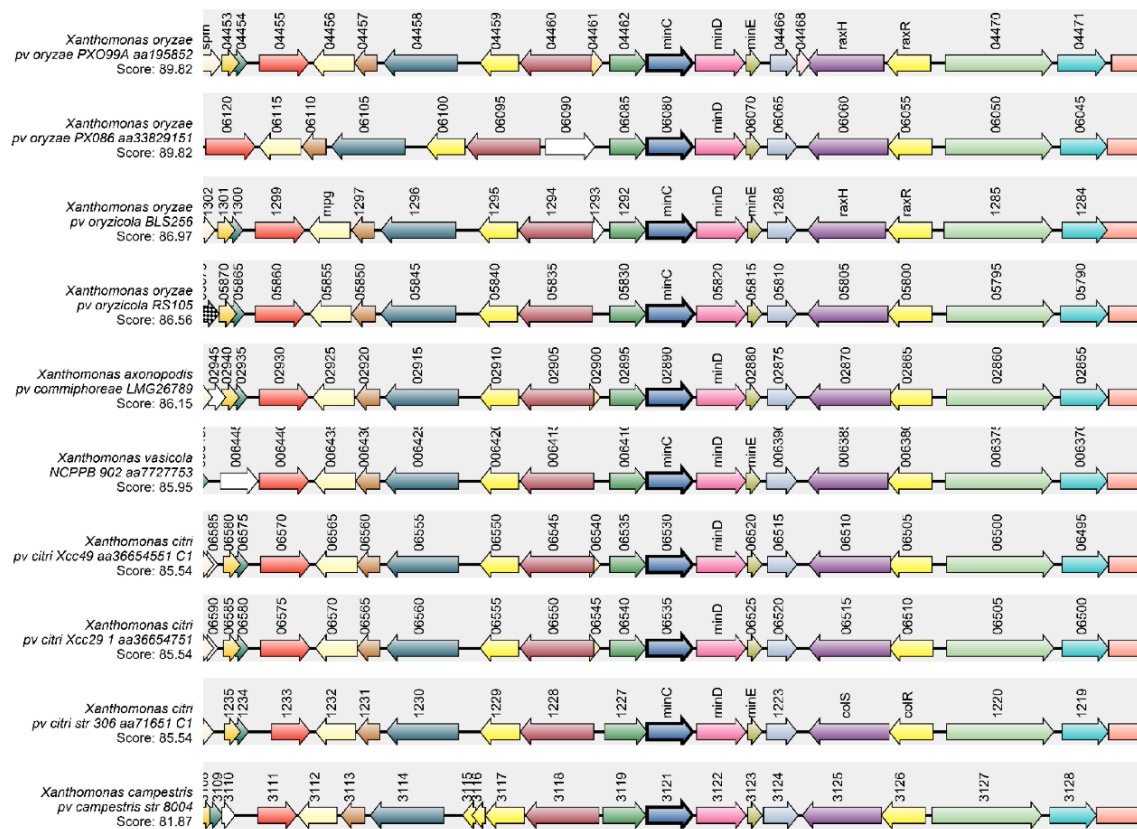

**Figure S2. Synteny analysis of the *minCDE* gene cluster among *Xanthomonas* strains.** Genomic sections of various *Xanthomonas* spp. were aligned based on the *minC* gene highlighted in black. Synteny analysis was performed using the SyntTax bioinformatics tools provided with the Absynte algorithm (<http://archaea.u-psud.fr/synttax/>) with ten *Xanthomonas* genomes as a reference. According to the synteny results, the Min system is conserved in *Xanthomonas* species.

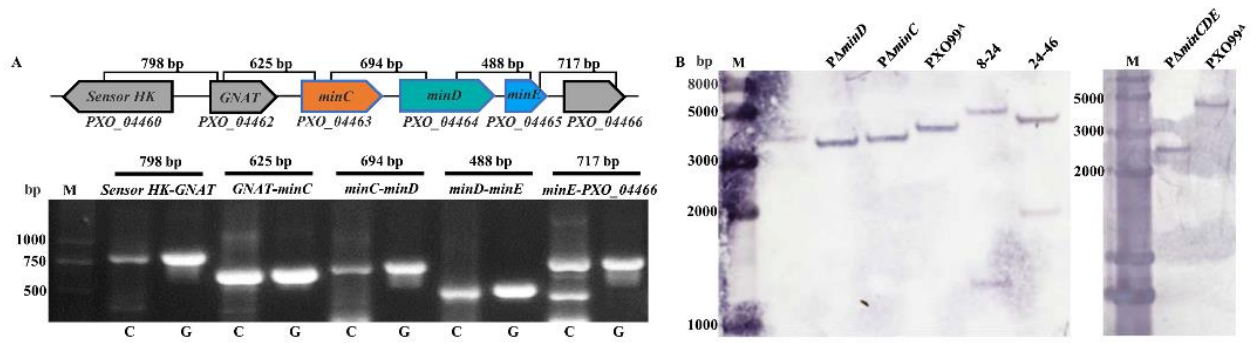

**Figure S3. Transcription unit analysis of the *minCDE* gene cluster in *Xoo* PXO99<sup>A</sup> and Southern blot analysis of the *Xoo* Min mutants.** (A) Co-transcription of *PXO\_04462-minC-minD-minE-PXO\_04466* by RT-PCR. C: cDNA, G: genomic DNA. (B) Southern blot analysis of the *Xoo* Min mutants  $P\Delta minC$ ,  $P\Delta minD$ ,  $P\Delta minCDE$ , 8-24 and 24-46. Genomic DNA were digested with *Bam*HI and hybridized with a DNA probe directed against the *minCDE* gene fragment.

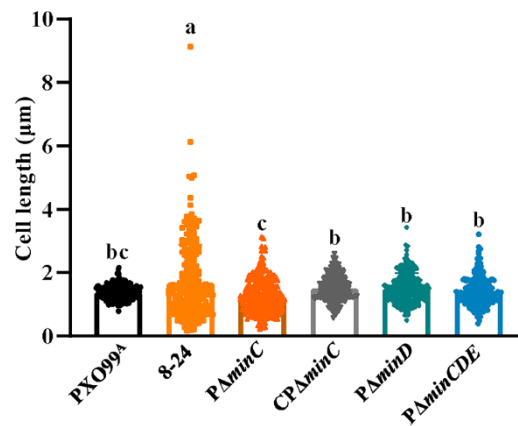

**Figure S4. Cell length distribution of the *Xoo* Min mutants 8-24,  $P\Delta minC$ ,  $P\Delta minD$ ,  $P\Delta minCDE$ , and the complementary strain  $CP\Delta minC$ .** Cell lengths of the wild-type PXO99<sup>A</sup>, 8-24,  $P\Delta minC$ ,  $CP\Delta minC$ ,  $P\Delta minD$  and  $P\Delta minCDE$  were calculated by ImageJ software from the pictures of scanning electron microscope (SEM) ( $n \geq 200$  cells). Differences between strains were compared using the LSD test, different letters indicate significant differences ( $p < 0.05$ ).

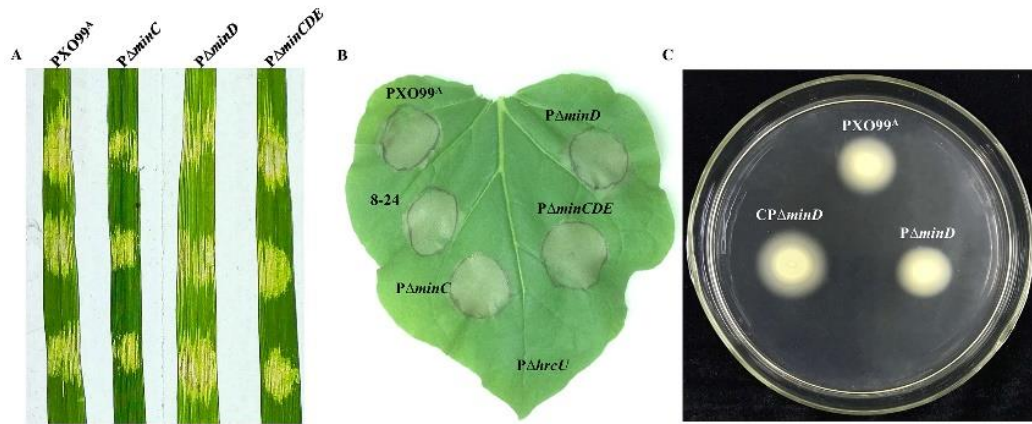

**Figure S5. Phenotypes about water-soaked lesions in host rice, hypersensitive response in nonhost tobacco and swimming motility of the Min mutants.** (A) Water-soaked lesions on IR24 caused by PXO99<sup>A</sup>, PΔ<sup>min</sup>C, PΔ<sup>min</sup>D, and PΔ<sup>min</sup>CDE at 3 days post inoculation. Bacterial suspensions (OD<sub>600</sub>=1.0) were infiltrated into the leaves of susceptible rice IR24. (B) Hypersensitive response in nonhost tobacco caused by PXO99<sup>A</sup>, 8-24, PΔ<sup>min</sup>C, PΔ<sup>min</sup>D, and PΔ<sup>min</sup>CDE at 1 day post inoculation. Bacterial suspensions (OD<sub>600</sub>=1.0) were infiltrated into the leaves of tobacco. PΔ<sup>hrcU</sup> is a T3SS defective mutant of Xoo PXO99<sup>A</sup> as a negative control. (C) Swimming motility of PXO99<sup>A</sup>, PΔ<sup>min</sup>D, and CPΔ<sup>min</sup>D on NA medium with 0.15% agar.

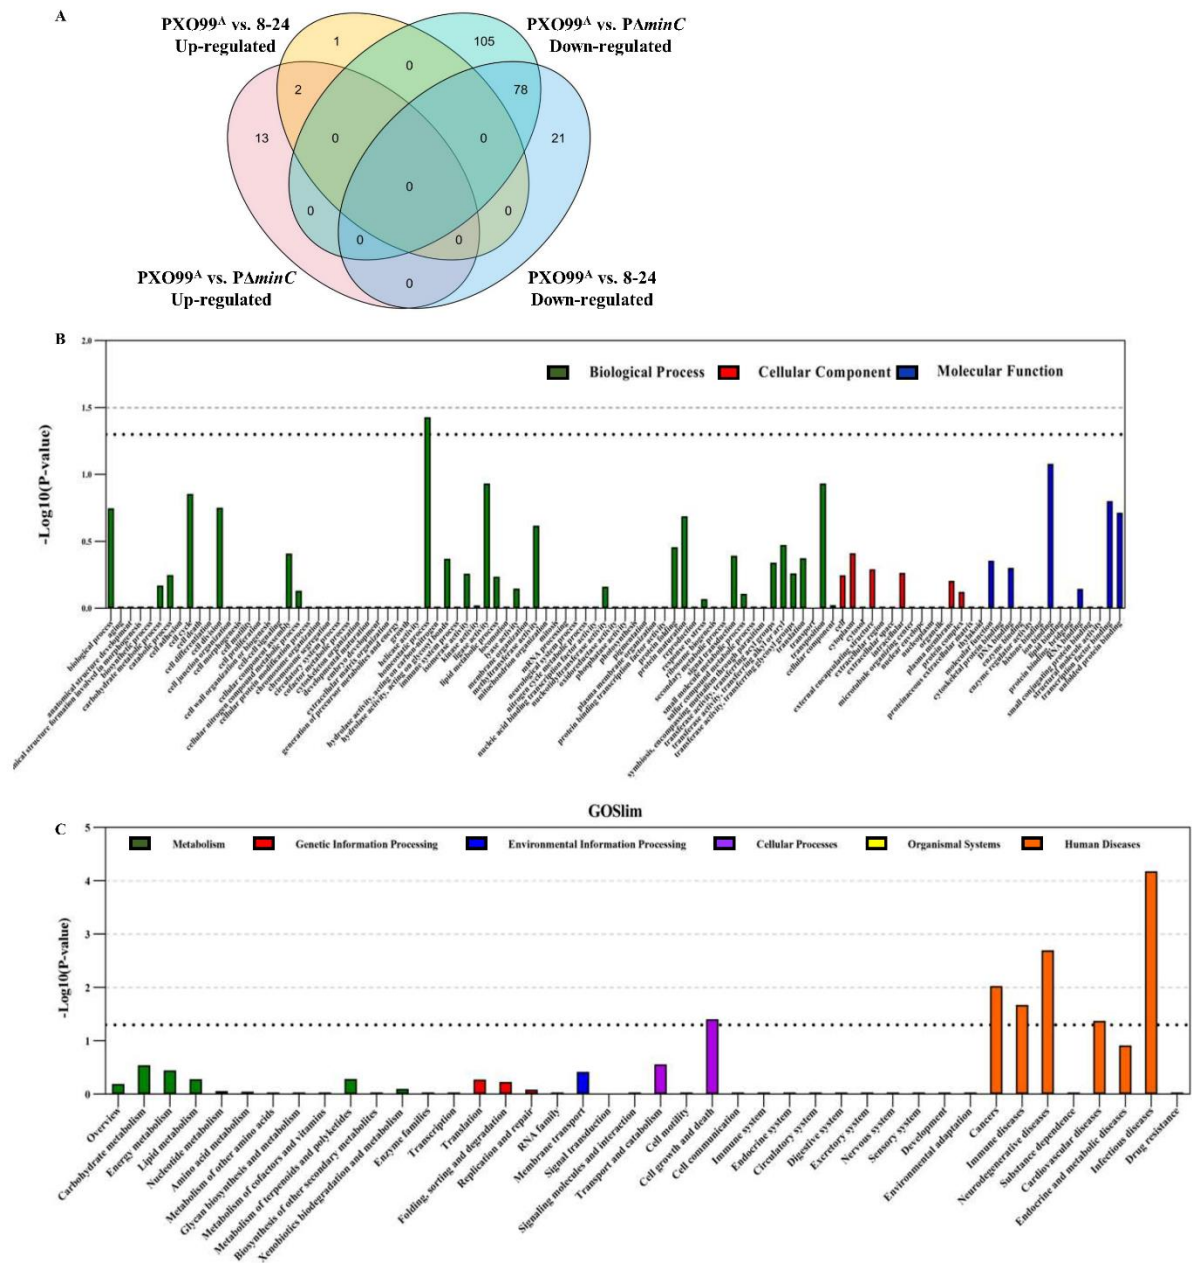

**Figure S6. Venn diagram analysis, GO analysis and KEGG analysis of the differentially expressed genes (DEGs) in PXO99<sup>A</sup> versus in PΔ*minC* and 8-24.** (A) Venn diagram analysis of the up-regulated and down-regulated genes in PXO99<sup>A</sup> versus PΔ*minC* and 8-24. DEGs were selected with the standards (log<sub>2</sub>Fold Change > 1). The overlapping DEGs were represented as the number. (B) GO analysis of DEGs in the *minC* mutant 8-24. The abscissa axis represents the GO category, and the ordinate axis represents the value of significant ( $P < 0.05$ ). (C) KEGG analysis of DEGs in the *minC* mutant 8-24. The abscissa axis represents the KEGG pathway, and the ordinate axis represents the value of significant ( $P < 0.05$ ).
