# Supplementary material for: The MinCDE Cell Division System Participates in the Regulation of Type III Secretion System (T3SS) Genes, Bacterial Virulence, and Motility in Xanthomonas oryzae pv. oryzae
Source: MDPI journal article supplement (doi:10.3390/microorganisms10081549), 2022-07-31
Supplement: s1 [file s1]

**Supplementary Table S1. Bacterial strains and plasmids used in this study**

| Strains or plasmids                          | Relevant characteristics <sup>a</sup>                                                                | Source          |
|----------------------------------------------|------------------------------------------------------------------------------------------------------|-----------------|
| <b>Strains</b>                               |                                                                                                      |                 |
| <i>Xanthomonas. oryzae</i> pv. <i>oryzae</i> |                                                                                                      |                 |
| PXO99 <sup>A</sup>                           | The <i>Xoo</i> wild-type strain, Philippine race 6                                                   | [32]            |
| 8-24                                         | <i>minC</i> Tn5 insertion mutant of PXO99 <sup>A</sup> ; Km <sup>r</sup>                             | This study      |
| 24-46                                        | <i>minD</i> Tn5 insertion mutant of PXO99 <sup>A</sup> ; Km <sup>r</sup>                             | This study      |
| PΔ <i>minC</i>                               | <i>minC</i> deletion mutant of PXO99 <sup>A</sup>                                                    | This study      |
| PΔ <i>minD</i>                               | <i>minD</i> deletion mutant of PXO99 <sup>A</sup>                                                    | This study      |
| PΔ <i>minCDE</i>                             | Triple <i>minC</i> , <i>minD</i> and <i>minE</i> deletion mutant of PXO99 <sup>A</sup>               | This study      |
| C8-24                                        | 8-24 harbouring pML123- <i>minC</i> ; Km <sup>r</sup> , Gm <sup>r</sup>                              | This study      |
| CPΔ <i>minC</i>                              | PΔ <i>minC</i> harbouring pML123- <i>minC</i> ; Gm <sup>r</sup>                                      | This study      |
| CPΔ <i>minD</i>                              | PΔ <i>minD</i> harbouring pML123- <i>minD</i> ; Gm <sup>r</sup>                                      | This study      |
| CPΔ <i>minCDE</i>                            | PΔ <i>minCDE</i> harbouring pML123- <i>minCDE</i> ; Gm <sup>r</sup>                                  | This study      |
| PΔ <i>hrpG</i>                               | <i>hrpG</i> deletion mutant of PXO99 <sup>A</sup>                                                    | This laboratory |
| PΔ <i>hrcU</i>                               | <i>hrcU</i> deletion mutant of PXO99 <sup>A</sup>                                                    | This laboratory |
| PΔ <i>trh</i>                                | <i>trh</i> insertion mutant of PXO99 <sup>A</sup> ; Km <sup>r</sup>                                  | This laboratory |
| PΔ <i>xrvA</i>                               | <i>xrvA</i> insertion mutant of PXO99 <sup>A</sup> ; Km <sup>r</sup>                                 | This laboratory |
| PΔ <i>zur</i>                                | <i>zur</i> insertion mutant of PXO99 <sup>A</sup> ; Km <sup>r</sup>                                  | This laboratory |
| PΔ <i>rpfC</i>                               | <i>rpfC</i> insertion mutant of PXO99 <sup>A</sup> ; Km <sup>r</sup>                                 | This laboratory |
| PΔ <i>rpfG</i>                               | <i>rpfG</i> insertion mutant of PXO99 <sup>A</sup> ; Km <sup>r</sup>                                 | This laboratory |
| PΔ <i>rpfF</i>                               | <i>rpfF</i> insertion mutant of PXO99 <sup>A</sup> ; Km <sup>r</sup>                                 | This laboratory |
| PΔ <i>clp</i>                                | <i>clp</i> insertion mutant of PXO99 <sup>A</sup> ; Km <sup>r</sup>                                  | This laboratory |
| <b>Escherichia coli</b>                      |                                                                                                      |                 |
| DH5a                                         | φ901ac ZΔM15, recA1                                                                                  | Invitrogen      |
| <b>Plasmids</b>                              |                                                                                                      |                 |
| pHG2- <i>hrpF</i>                            | The <i>Xoo</i> <i>hrpX</i> promoter cloned in pHG2; Sp <sup>r</sup>                                  | [33]            |
| pHG3- <i>hrpB1</i>                           | The <i>Xoo</i> <i>hrpB1</i> promoter cloned in pHG3; Sp <sup>r</sup>                                 | [36]            |
| pHG2- <i>hrpG</i>                            | The <i>Xoo</i> <i>hrpG</i> promoter cloned in pHG2; Sp <sup>r</sup>                                  | [36]            |
| pHG2- <i>hrpX</i>                            | The <i>Xoo</i> <i>hrpX</i> promoter cloned in pHG2; Sp <sup>r</sup>                                  | [36]            |
| pH1- <i>hrpG</i> ::FLAG                      | The fusion of <i>hrpG</i> ::FLAG cloned in pH1; Sp <sup>r</sup>                                      | [33]            |
| pH3- <i>hrpX</i> ::FLAG                      | The fusion of <i>hrpX</i> ::FLAG cloned in pH3; Sp <sup>r</sup>                                      | [33]            |
| pH3- <i>hrpB1</i> ::FLAG                     | The fusion of <i>hrpB1</i> ::FLAG cloned in pH3; Sp <sup>r</sup>                                     | [33]            |
| pML123- <i>minC</i>                          | The <i>minC</i> complementary fragment cloned in pML123; Gm <sup>r</sup>                             | This study      |
| pML123- <i>minD</i>                          | The <i>minD</i> complementary fragment cloned in pML123; Gm <sup>r</sup>                             | This study      |
| pML123- <i>minCDE</i>                        | The <i>minCDE</i> complementary fragment cloned in pML123; Gm <sup>r</sup>                           | This study      |
| pHM1- <i>gfp</i>                             | A high-copy vector harbouring a <i>gfp</i> gene derived from pHM1; Sp <sup>r</sup> , Ap <sup>r</sup> | This laboratory |
| pHG2- <i>hrpG</i> - <i>post</i>              | The post transcriptional fusion of <i>hrpG</i> :: <i>uidA</i> cloned in pH2; Sp <sup>r</sup>         | This laboratory |

<sup>a</sup>Ap<sup>r</sup>, ampicillin resistance; Km<sup>r</sup>, kanamycin resistance; Gm<sup>r</sup>, gentamycin resistance; Sp<sup>r</sup>,

streptomycin resistance

**Supplementary Table S2:** Primer sequences used in this study

| Primers Name                      | Primer Sequences (5'-3')       | Description                                          |
|-----------------------------------|--------------------------------|------------------------------------------------------|
| <i>minC</i> up-F                  | GTGTCTAGACGCATGTAATAATCCAACGC  |                                                      |
| <i>minC</i> up-R                  | ATGAAGCTTAGCACACCGGCTTCGTGCAG  | For <i>minC</i> deletion mutant                      |
| <i>minC</i> down-F                | GAGAAGCTTATCTTCTGCCGCGACTTCCA  | construction                                         |
| <i>minC</i> down-R                | ACTCCCGGGCAGCCAGGTCCTTGAGCAC   |                                                      |
| <i>minD</i> up-F                  | ACTCTGCAGCGATGCGGCCTTGCTGTTC   |                                                      |
| <i>minD</i> up-R                  | GACTCTAGAGGCTTGCGCTGGTGGTGGT   | For <i>minD</i> deletion mutant                      |
| <i>minD</i> down-F                | AAGTCTAGAGCGTGGAAGGCGGCGAGATG  | construction                                         |
| <i>minD</i> down-R                | AGAGGATCCCGGTCGGGTCACAGGCAACA  |                                                      |
| <i>minCDE</i> up-F                | AACTGCGATTATATGCCGATGTGCAGA    |                                                      |
| <i>minCDE</i> up-R                | GACTCTAGAGGTCACGCGCTCACGCATT   | For <i>minC</i> , <i>minD</i> and <i>minE</i> triple |
| <i>minCDE</i> down-F              | AAGTCTAGAGAAGACGGCGACAAGTAAG   | deletion mutant construction                         |
| <i>minCDE</i> down-R              | AGAGGATCCAGTGCCTCGGTTCGAACAGT  |                                                      |
| GNAT- <i>minC</i> -F              | CGGGTTTCTGGTCGGATTCG           | For confirmation of GNAT- <i>minC</i>                |
| GNAT- <i>minC</i> -R              | GGAAGTCGCGGCAGAAGATG           | operon                                               |
| <i>minC</i> -D-F                  | ACCACCAGCGCAAGCCTGGC           | For confirmation of <i>minC</i> -D                   |
| <i>minC</i> -D-R                  | GTTCGCCATCCTTGACCAGA           | operon                                               |
| <i>minD</i> -E-F                  | ACCACCAGCGCAAGCCTGGC           | For confirmation of <i>minD</i> -E                   |
| <i>minD</i> -E-R                  | GTTCGCCATCCTTGACCAGATC         | operon                                               |
| <i>minE</i> - <i>PXO</i> _04466-F | ATGGGCCTGCTCGATTTTCT           | For confirmation of <i>minE</i> -                    |
| <i>minE</i> - <i>PXO</i> _04466-R | TCACGCAGGCAACAAGCCGC           | <i>PXO</i> _04466 operon                             |
| <i>minC</i> com-F                 | GAGAAGCTTGAACAACAATGCCGGACTG   | For <i>minC</i> complementray fragment               |
| <i>minC</i> com-R                 | GATGTCGACACCACGCGCCGCTCGCAGC   |                                                      |
| <i>minCDE</i> com-F               | GAGAAGCTTGAACAACAATGCCGGACTG   | For <i>minC</i> , <i>minD</i> and <i>minE</i>        |
| <i>minCDE</i> com-R               | GATGTCGACTCGCTCGCGGTCGGGTCACAG | complementray fragment                               |
| <i>minD</i> com-F                 | GAGAAGCTTATCGATGTTGACGTACTTC   | For <i>minD</i> complementray fragment               |
| <i>minD</i> com-R                 | GATGTCGACAGTTGTATGCGGAGAACTG   |                                                      |
| <i>hrpB1</i> -F                   | TTCGATGCATGGATTTTCGATCAAGC     | <i>hrpB1</i> gene fragment for qRT-PCR               |
| <i>hrpB1</i> -R                   | CGCCGGTGCGGACGTTGGGGTAGTT      |                                                      |
| <i>rpfC</i> -F                    | ACCACGCGTCTGGATGTAGAGCAGAAGG   | <i>rpfC</i> gene fragment for qRT-PCR                |
| <i>rpfC</i> -R                    | GCACCTCTTCCACCAGCGACAGCAGACT   |                                                      |
| <i>rpfG</i> -F                    | TGGAGCAGCGCTTGCTGGCCAGCATGAA   | <i>rpfG</i> gene fragment for qRT-PCR                |
| <i>rpfG</i> -R                    | CGACAACCCAGTTGCTCGGCAATCAGG    |                                                      |
| <i>rpfF</i> -F                    | CAGTTGCTTGGCATGGGTCT           | <i>rpfF</i> gene fragment for qRT-PCR                |
| <i>rpfF</i> -R                    | TGGTACTGCGGTGGTCATTT           |                                                      |
| <i>clp</i> -F                     | GTTGTTCATCGAATCCGATACCCGCGAG   | <i>clp</i> gene fragment for qRT-PCR                 |
| <i>clp</i> -R                     | ATCTTCGGCGCATCCGGCGACAGGCTGG   |                                                      |
| <i>xrvA</i> -F                    | CGAACTGCAGAAGCTGGAAGAACAGGAG   | <i>xrvA</i> gene fragment for qRT-PCR                |
| <i>xrvA</i> -R                    | CTTCGCTGCGGCCGCTCTTGACCACGTT   |                                                      |
| <i>trh</i> -F                     | CAACTTGAAGCCGAAGGCCGCATCTACC   | <i>trh</i> gene fragment for qRT-PCR                 |

|                   |                              |                                       |
|-------------------|------------------------------|---------------------------------------|
| <i>trh</i> -R     | ACGTACTGCATGAAACCGGCGATGCTGG |                                       |
| <i>rpoD</i> qRT-F | CGACAACACCACCAACATCAATC      | <i>rpoD</i> gene fragment for qRT-PCR |
| <i>rpoD</i> qRT-R | GCTTACCGACCTCTTCCAACG        |                                       |
| <i>gyrB</i> qRT-F | CGGCACTTACGACTCCAGCAAG       | <i>gyrB</i> gene fragment for qRT-PCR |
| <i>gyrB</i> qRT-R | CGACCAGGATTTTCACCACGATG      |                                       |

---

Note: Underlined bases indicate restriction enzyme sites
